# Supplementary material for: Analysis of Left Ventricular Indexes and Mortality Among Asian Adults With Hemodynamically Significant Chronic Aortic Regurgitation
Source: PubMed Central journal article supplement (PMC10313151; doi:10.1001/jamanetworkopen.2023.4632), 2023-03-24
Supplement: jamanetwopen-e234632-s001.pdf [file jamanetwopen-e234632-s001.pdf]

## Supplementary Online Content

Yang LT, Lee CC, Su CH, et al. Analysis of left ventricular indexes and mortality among Asian adults with hemodynamically significant chronic aortic regurgitation. *JAMA Netw Open*. 2023;6(3):e234632. doi:10.1001/jamanetworkopen.2023.4632

**eFigure 1.** Study Flow

**eTable 1.** Factors Linked to Aortic Valve Surgical Intervention in Taiwanese and Japanese Individuals

**eTable 2.** Univariate Cox Proportional Hazards Regression Analysis for Factors Associated With All-cause Death Under Medical Surveillance

**eTable 3.** Univariate Cox Proportional Hazards Regression Analysis for Factors Associated With All-cause Death During Total Follow-Up

**eTable 4.** Multivariate Cox Proportional Hazards Regression Analysis for Factors Associated With Cardiovascular Death Under Medical Surveillance

**eTable 5.** Multivariate Cox Proportional Hazards Regression Analysis for Factors Associated With Cardiovascular Death During Total Follow-Up

**eFigure 2.** Survival Between Japanese and Taiwanese Individuals Using Inverse Probability of Treatment Weighting Model

**eTable 6.** Factors Associated With All-cause Death Under Medical Surveillance in Patients with LVEF of 50% or Greater and NYHA Class I

**eTable 7.** Comparison Between Asian and Western Individuals

This supplementary material has been provided by the authors to give readers additional information about their work.

**eFigure 1. Study Flow**

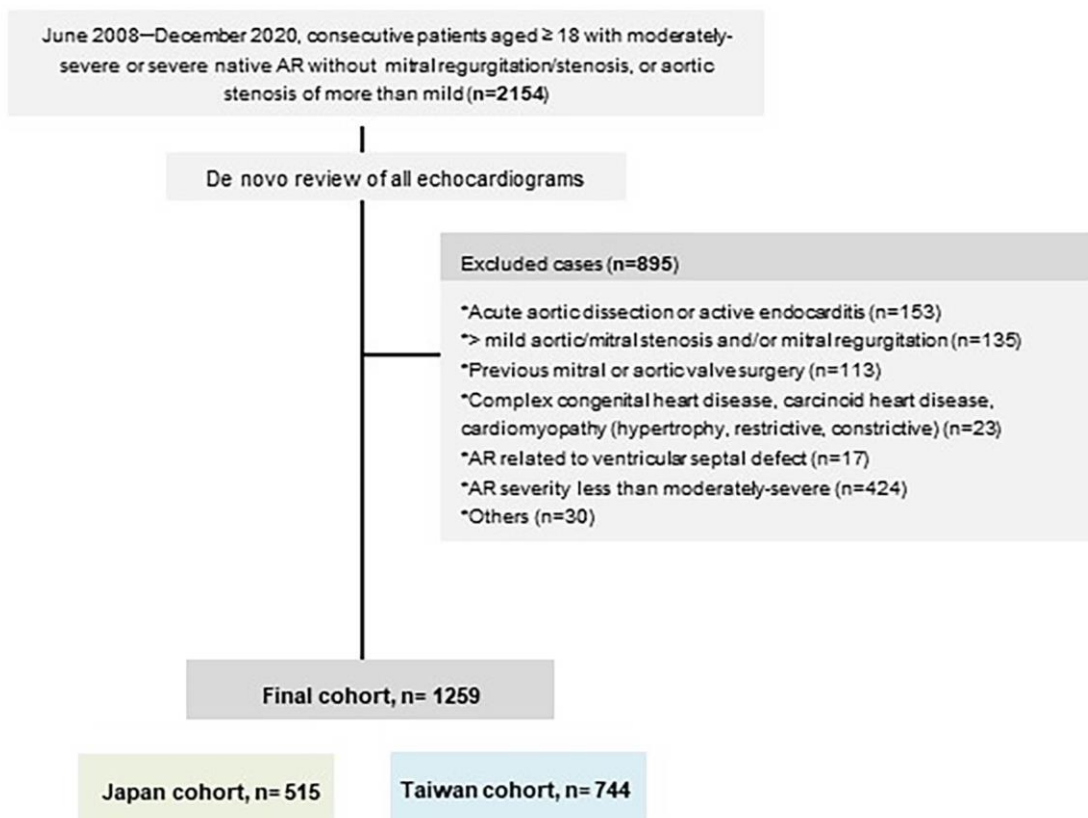

**eTable 1. Factors Linked to Aortic Valve Surgical Intervention in Taiwanese and Japanese Individuals**

|                                      | Taiwan (n=744, 258 AVS) |         | Japan (n=515, 225 AVS) |         |
|--------------------------------------|-------------------------|---------|------------------------|---------|
|                                      | HR(95% CI)              | P value | HR(95% CI)             | P value |
| Model 1*                             |                         |         |                        |         |
| <b>LVESDi, mm/m<sup>2</sup></b>      | 1.06(1.04-1.08)         | <0.0001 | 1.05(1.02-1.07)        | <0.0001 |
| Model 2*                             |                         |         |                        |         |
| <b>LVEF per 10%</b>                  | 0.84(0.74-0.96)         | 0.01    | 0.84(0.73-0.96)        | 0.01    |
| Model 3*                             |                         |         |                        |         |
| <b>LVESVi per 10ml/m<sup>2</sup></b> | 1.12(1.08-1.17)         | <0.0001 | 1.10(1.05-1.15)        | <0.0001 |

See abbreviations from Table 2 and Table 3.

\*All models were adjusted for age, sex, Charlson score, and New York Heart Association functional class.

**eTable 2.** Univariate Cox Proportional Hazards Regression Analysis for Factors Associated With All-cause Death Under Medical Surveillance (n=201).

|                                   | Total, n=1259   |                 | Taiwan, n=744   |                 | Japan, n=515    |                 |
|-----------------------------------|-----------------|-----------------|-----------------|-----------------|-----------------|-----------------|
|                                   | HR (95% CI)     | P               | HR (95% CI)     | P               | HR (95% CI)     | P               |
| Age                               | 1.08(1.06-1.09) | < <b>0.0001</b> | 1.07(1.06-1.09) | < <b>0.0001</b> | 1.08(1.05-1.12) | < <b>0.0001</b> |
| Female                            | 1.55(1.15-2.07) | <b>0.004</b>    | 1.77(1.27-2.46) | <b>0.001</b>    | 1.51(0.79-2.86) | 0.21            |
| CCI                               | 1.42(1.34-1.50) | < <b>0.0001</b> | 1.36(1.28-1.45) | < <b>0.0001</b> | 1.62(1.43-1.83) | < <b>0.0001</b> |
| NYHA (I as reference)             |                 | < <b>0.0001</b> |                 | < <b>0.0001</b> |                 | <b>0.01</b>     |
| II                                | 2.04(1.48-2.81) |                 | 2.09(1.46-2.98) |                 | 1.44(0.68-3.08) |                 |
| III/IV                            | 6.8(4.70-9.93)  |                 | 7.45(4.90-11.3) |                 | 4.52(1.91-10.7) |                 |
| LVEF per 10%                      | 0.70(0.62-0.80) | < <b>0.0001</b> | 0.66(0.56-0.78) | < <b>0.0001</b> | 0.59(0.46-0.75) | < <b>0.0001</b> |
| LVESDi, mm/m <sup>2</sup>         | 1.05(1.03-1.08) | < <b>0.0001</b> | 1.08(1.05-1.11) | < <b>0.0001</b> | 1.07(1.02-1.12) | <b>0.006</b>    |
| LVESD, mm                         | 1.00(0.98-1.02) | 0.38            | 1.01(0.99-1.04) | 0.08            | 1.01(0.97-1.05) | 0.44            |
| LVESDi <20 mm/m <sup>2</sup>      | Reference       |                 | Reference       |                 | Reference       |                 |
| 20-25 mm/m <sup>2</sup>           | 1.31(0.90-1.92) | 0.15            | 1.55(1.05-2.30) | <b>0.02</b>     | 1.01(0.22-4.63) | 0.98            |
| >25 mm/m <sup>2</sup>             | 2.04(1.38-3.01) | <b>0.0002</b>   | 3.00(1.96-4.59) | < <b>0.0001</b> | 2.23(0.53-9.44) | 0.27            |
| LVESVi per 10ml/ m <sup>2</sup> * | 1.06(1.00-1.12) | <b>0.02</b>     | 1.08(1.01-1.15) | <b>0.02</b>     | 1.14(1.05-1.24) | <b>0.006</b>    |
| Taiwanese vs Japanese             | 1.99(1.39-2.84) | < <b>0.0001</b> |                 |                 |                 |                 |

CCI, Charlson comorbidity index. See Table 1 and 2 for abbreviations.

\*After adjusting for age, the hazard ratio, 95%, and p value for LVESVi per 10ml/m<sup>2</sup> in the total cohort, Taiwanese and Japanese was 1.07(1.02-1.12; P=0.005), 1.10(1.04-1.17; P=0.001), and 1.13(1.03-1.22; p=0.009).

†After adjustment for age, sex, Charlson score, and NYHA, the HR, CI, and P value of LVESD in the entire-, Taiwan-, Japan-cohort was 1.00(0.98-1.02), P=0.45 ; 1.02(1.00-1.04), P=0.035; 1.01(0.97-1.05), P=0.39, respectively.

**eTable 3.** Univariate Cox Proportional Hazards Regression Analysis for Factors Associated With All-cause Death During Total Follow-Up (n=240)

|                                   | Total, n=1259   |         | Taiwan, n=744   |         | Japan, n=515    |         |
|-----------------------------------|-----------------|---------|-----------------|---------|-----------------|---------|
|                                   | HR (95% CI)     | P       | HR (95% CI)     | P       | HR (95% CI)     | P       |
| Age                               | 1.07(1.06-1.09) | <0.0001 | 1.07(1.06-1.09) | <0.0001 | 1.08(1.05-1.11) | <0.0001 |
| Female                            | 1.54(1.17-2.02) | 0.002   | 1.73(1.27-2.36) | 0.0007  | 1.44(0.80-2.59) | 0.22    |
| CCI                               | 1.47(1.39-1.54) | <0.0001 | 1.41(1.32-1.49) | <0.0001 | 1.63(1.45-1.83) | <0.0001 |
| NYHA (I as reference)             |                 | <0.0001 |                 | <0.0001 |                 | 0.001   |
| II                                | 1.85(1.38-2.48) |         | 2.08(1.50-2.88) |         | 1.00(0.50-2.01) |         |
| III/IV                            | 5.17(3.67-7.29) |         | 5.31(3.58-7.88) |         | 4.26(2.09-8.70) |         |
| <b>Time-dependent AVS</b>         | 0.40(0.28-0.57) | <0.001  | 0.44(0.29-0.66) | <0.001  | 0.42(0.21-0.87) | 0.01    |
| LVEF per 10%                      | 0.76(0.68-0.86) | <0.0001 | 0.70(0.61-0.81) | <0.0001 | 0.66(0.53-0.83) | 0.0007  |
| LVESDi, mm/m <sup>2</sup>         | 1.03(1.01-1.05) | 0.003   | 1.06(1.03-1.08) | <0.0001 | 1.04(1.00-1.09) | 0.03    |
| LVESD, mm                         | 0.99(0.97-1.00) | 0.21    | 1.00(0.98-1.02) | 0.85    | 0.99(0.96-1.02) | 0.89    |
| LVESDi <20 mm/m <sup>2</sup>      | Reference       |         | Reference       |         | Reference       |         |
| 20-25 mm/m <sup>2</sup>           | 1.26(0.87-1.82) | 0.20    | 1.50(1.02-2.20) | 0.03    | 1.08(0.24-4.81) | 0.91    |
| >25 mm/m <sup>2</sup>             | 1.64(1.14-2.37) | 0.007   | 2.45(1.65-3.65) | <0.0001 | 1.82(0.43-7.61) | 0.40    |
| LVESVi per 10ml/ m <sup>2</sup> * | 1.00(0.95-1.05) | 0.81    | 1.02(1.08-0.97) | 0.45    | 1.07(0.98-1.14) | 0.08    |
| Taiwanese vs Japanese             | 2.19(1.59-3.02) | <0.0001 |                 |         |                 |         |

CCI, Charlson comorbidity index. See Table 1 for abbreviations.

\*After adjusting for age, the hazard ratio, 95%, and p value for LVESVi per 10ml/m<sup>2</sup> in the total cohort, Taiwanese and Japanese was 1.03(0.98-1.07; P=0.12), 1.05(1.00-1.10; P=0.042), and 1.11(1.01-1.19; p=0.017).

**eTable 4.** Multivariate Cox Proportional Hazards Regression Analysis for Factors Associated With Cardiovascular Death Under Medical Surveillance (n=74)\*

|                                | Total, n=1259   |         | Taiwan, n=744   |         | Japan, n=515    |        |
|--------------------------------|-----------------|---------|-----------------|---------|-----------------|--------|
|                                | HR (95% CI)     | P       | HR (95% CI)     | P       | HR (95% CI)     | P      |
| <b>Model 1: LVEF</b>           |                 |         |                 |         |                 |        |
| Age                            | 1.05(1.03-1.07) | <0.0001 | 1.05(1.03-1.07) | <0.0001 |                 |        |
| Female                         | 1.81(1.11-2.95) | 0.01    | 1.55(0.89-2.69) | 0.12    |                 |        |
| Charlson comorbidity index     | 1.09(0.96-1.24) | 0.15    | 0.97(0.82-1.13) | 0.78    |                 |        |
| NYHA (I as reference)          |                 |         |                 |         |                 |        |
| II                             | 1.15(0.65-2.02) | 0.61    | 1.28(0.69-2.37) | 0.42    |                 |        |
| III/IV                         | 2.56(1.21-5.41) | 0.01    | 3.95(1.72-9.03) | 0.001   |                 |        |
| LVEF per 10%                   | 0.69(0.56-0.85) | 0.0008  | 0.72(0.57-0.91) | 0.007   | 0.47(0.32-0.70) | 0.0006 |
| Taiwanese vs Japanese          | 3.34(1.75-6.39) | <0.0001 |                 |         |                 |        |
| <b>Model 2: LVESDi</b>         |                 |         |                 |         |                 |        |
| Age                            | 1.05(1.03-1.07) | <0.0001 | 1.05(1.02-1.07) | <0.0001 |                 |        |
| Female                         | 1.60(0.98-2.60) | 0.06    | 1.41(0.81-2.44) | 0.22    |                 |        |
| Charlson comorbidity index     | 1.13(0.99-1.28) | 0.05    | 1.00(0.86-1.17) | 0.90    |                 |        |
| NYHA (I as reference)          |                 |         |                 |         |                 |        |
| II                             | 1.22(0.70-2.14) | 0.46    | 1.35(0.73-2.49) | 0.33    |                 |        |
| III/IV                         | 2.88(1.41-5.89) | 0.003   | 4.12(1.86-9.12) | 0.0005  |                 |        |
| LVESDi, mm/m <sup>2</sup>      | 1.05(1.01-1.09) | 0.01    | 1.05(1.00-1.10) | 0.04    | 1.06(1.02-1.10) | 0.0009 |
| Taiwanese vs Japanese          | 3.33(1.70-6.49) | 0.0001  |                 |         |                 |        |
| <b>Model 3: LVESVi</b>         |                 |         |                 |         |                 |        |
| Age                            | 1.05(1.03-1.08) | <0.0001 | 1.05(1.03-1.08) | <0.0001 |                 |        |
| Female                         | 2.00(1.21-3.29) | 0.007   | 1.64(0.93-2.89) | 0.08    |                 |        |
| Charlson comorbidity index     | 1.13(1.00-1.28) | 0.04    | 1.01(0.87-1.18) | 0.80    |                 |        |
| NYHA (I as reference)          |                 |         |                 |         |                 |        |
| II                             | 1.11(0.63-1.96) | 0.69    | 1.25(0.67-2.34) | 0.47    |                 |        |
| III/IV                         | 2.63(1.28-5.37) | 0.007   | 4.04(1.81-8.99) | 0.0006  |                 |        |
| LVESVi per 10ml/m <sup>2</sup> | 1.15(1.06-1.24) | 0.0007  | 1.12(1.02-1.24) | 0.02    | 1.10(1.02-1.18) | 0.01   |
| Taiwanese vs Japanese          | 3.69(1.89-7.22) | <0.0001 |                 |         |                 |        |

See Table 1 for abbreviations.

\*Cardiovascular death occurred in 62 Taiwanese and 12 Japanese, respectively.

**eTable 5.** Multivariate Cox Proportional Hazards Regression Analysis for Factors Associated With Cardiovascular Death During Total Follow-Up (n=94)\*

|                                | Total, n=1259    |              | Taiwan, n=744   |              | Japan, n=515    |              |
|--------------------------------|------------------|--------------|-----------------|--------------|-----------------|--------------|
|                                | 94 deaths        |              | 78 deaths       |              | 16 deaths       |              |
|                                | HR (95% CI)      | P            | HR (95% CI)     | P            | HR (95% CI)     | P            |
| <b>Model 1: LVEF</b>           |                  |              |                 |              |                 |              |
| Age                            | 1.05(1.03-1.06)  | <0.001       | 1.05(1.03-1.07) | <0.001       | 1.06(1.01-1.11) | <b>0.01</b>  |
| Female                         | 1.93(1.25-2.99)  | <b>0.003</b> | 1.84(1.12-3.01) | <b>0.01</b>  |                 |              |
| Charlson comorbidity index     | 1.15(1.02-1.28)  | <b>0.02</b>  | 1.07(0.93-1.22) | 0.3          |                 |              |
| NYHA (I as reference)          |                  |              |                 |              |                 |              |
| II                             | 1.34(0.81-2.24)  | 0.25         | 1.49(0.85-2.60) | 0.16         |                 |              |
| III/IV                         | 2.61(1.36-5.03)  | <b>0.004</b> | 3.07(1.47-6.42) | <b>0.003</b> |                 |              |
| LVEF per 10%                   | 0.72 (0.60-0.87) | <0.001       | 0.74(0.61-0.92) | <b>0.005</b> | 0.55(0.38-0.78) | <0.001       |
| Time-dependent AVS             | 0.70(0.40-1.23)  | 0.22         | 0.68(0.36-1.27) | 0.22         |                 |              |
| Taiwanese vs Japanese          | 3.31(1.88-5.83)  | <0.001       |                 |              |                 |              |
| <b>Model 2: LVESDi</b>         |                  |              |                 |              |                 |              |
| Age                            | 1.04(1.03-1.06)  | <0.001       | 1.05(1.03-1.07) | <0.001       | 1.06(1.01-1.11) | <b>0.02</b>  |
| Female                         | 1.73(1.12-2.67)  | <b>0.01</b>  | 1.66(1.02-2.71) | <b>0.04</b>  |                 |              |
| Charlson comorbidity index     | 1.18(1.06-1.32)  | <b>0.003</b> | 1.09(0.96-1.25) | 0.18         |                 |              |
| NYHA (I as reference)          |                  |              |                 |              |                 |              |
| II                             | 1.42(0.86-2.36)  | 0.17         | 1.56(0.90-2.72) | 0.12         |                 |              |
| III/IV                         | 2.93(1.56-5.53)  | <0.001       | 3.32(1.63-6.77) | <0.001       |                 |              |
| LVESDi, mm/m <sup>2</sup>      | 1.05(1.01-1.09)  | <b>0.008</b> | 1.05(1.01-1.09) | <b>0.02</b>  | 1.07(1.00-1.15) | <b>0.04</b>  |
| Time-dependent AVS             | 0.67(0.38-1.18)  | 0.17         | 0.63(0.33-1.19) | 0.16         |                 |              |
| Taiwanese vs Japanese          | 3.23(1.80-5.77)  | <0.001       |                 |              |                 |              |
| <b>Model 3: LVESVi</b>         |                  |              |                 |              |                 |              |
| Age                            | 1.05(1.03-1.07)  | <0.001       | 1.05(1.03-1.07) | <0.001       | 1.07(1.02-1.12) | <b>0.004</b> |
| Female                         | 2.01(1.28-3.16)  | <b>0.002</b> | 1.86(1.12-3.07) | <b>0.02</b>  |                 |              |
| Charlson comorbidity index     | 1.18(1.06-1.32)  | <b>0.003</b> | 1.10(0.96-1.25) | 0.16         |                 |              |
| NYHA (I as reference)          |                  |              |                 |              |                 |              |
| II                             | 1.38(0.83-2.30)  | 0.21         | 1.54(0.88-2.69) | 0.13         |                 |              |
| III/IV                         | 2.82(1.48-5.36)  | <b>0.002</b> | 3.34(1.62-6.88) | <b>0.001</b> |                 |              |
| LVESVi per 10ml/m <sup>2</sup> | 1.10(1.03-1.18)  | <b>0.004</b> | 1.08(0.99-1.17) | 0.06         | 1.18(1.06-1.30) | <b>0.002</b> |
| Time-dependent AVS             | 0.66(0.37-1.17)  | 0.15         | 0.65(0.34-1.25) | 0.16         |                 |              |
| Taiwanese vs Japanese          | 3.21(1.81-5.69)  | <0.001       |                 |              |                 |              |

During total follow-up, there were 78 and 16 cardiac deaths in Taiwanese and Japanese, respectively.

\*Cardiovascular death occurred in 78 Taiwanese and 16 Japanese, respectively.

**eFigure 2. Survival between Japanese and Taiwanese individuals using inverse probability of treatment weighting (IPTW) model.** Covariates related to survival were included in the model as the following: age, sex, body surface area, New York Heart Association functional class, Charlson comorbidity index, left ventricular ejection fraction, left ventricular end-systolic dimension index, left ventricular end-systolic volume index, left atrial volume index, and aortic valve surgery. Results showed that Japanese had better survival (hazard ratio, 2.23; 95% confidence interval, 1.51-3.30).

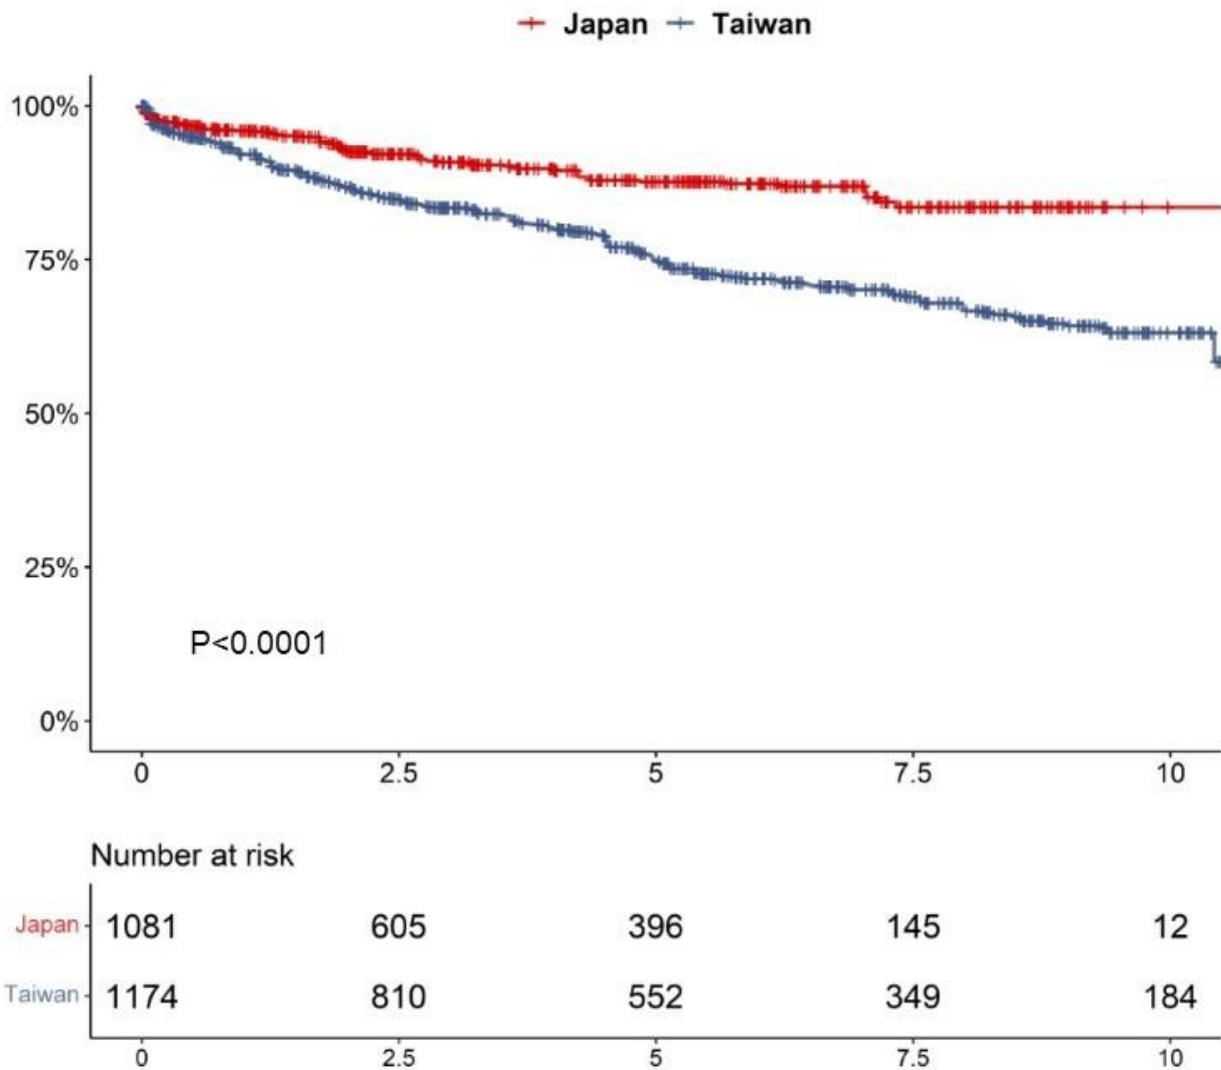



**eTable 6:** Factors Associated With All-cause Death Under Medical Surveillance in Patients with LVEF of 50% or Greater and NYHA Class I\*

|                                | Total, n=573    |         | Taiwan, n=331   |         | Japan, n=242    |         |
|--------------------------------|-----------------|---------|-----------------|---------|-----------------|---------|
|                                | HR (95% CI)     | P       | HR (95% CI)     | P       | HR (95% CI)     | P       |
| <b>Model 1: LVEF</b>           |                 |         |                 |         |                 |         |
| Age                            | 1.06(1.03-1.08) | <0.0001 | 1.05(1.03-1.08) | <0.0001 | 1.12(1.02-1.26) | 0.004   |
| Charlson comorbidity index     | 1.29(1.14-1.45) | 0.0002  | 1.21(1.03-1.39) | 0.01    | 1.57(1.23-1.98) | 0.0006  |
| Taiwanese vs Japanese          | 1.89(0.993-5.8) | 0.04    |                 |         |                 |         |
| LVEF per 10%                   | 0.88(0.58-1.32) | 0.55    | 1.10(0.69-1.75) | 0.66    | 0.35(0.07-1.19) | 0.10    |
| <b>Model 2: LVESDi</b>         |                 |         |                 |         |                 |         |
| Age                            | 1.06(1.03-1.09) | <0.0001 | 1.05(1.03-1.08) | <0.0001 | 1.14(1.03-1.29) | 0.002   |
| Charlson comorbidity index     | 1.27(1.12-1.43) | 0.0003  | 1.19(1.02-1.36) | 0.02    | 1.70(1.31-2.19) | 0.0002  |
| Taiwanese vs Japanese          | 2.49(1.294-8.0) | 0.003   |                 |         |                 |         |
| LVESDi, mm/m <sup>2</sup>      | 1.11(1.03-1.19) | 0.003   | 1.10(1.01-1.19) | 0.02    | 1.18(1.02-1.36) | 0.02    |
| <b>Model 3: LVESVi</b>         |                 |         |                 |         |                 |         |
| Age                            | 1.07(1.04-1.09) | <0.0001 | 1.06(1.03-1.09) | <0.0001 | 1.14(1.04-1.28) | 0.0007  |
| Charlson comorbidity index     | 1.27(1.12-1.42) | 0.0003  | 1.19(1.02-1.36) | 0.02    | 1.70(1.33-2.15) | <0.0001 |
| Taiwanese vs Japanese          | 2.39(1.24-4.58) | 0.008   |                 |         |                 |         |
| LVESVi per 10ml/m <sup>2</sup> | 1.36(1.10-1.65) | 0.003   | 1.25(0.98-1.57) | 0.06    | 1.93(1.20-3.10) | 0.006   |

Sex was not associated with all-cause death univariably thus was not included in the models.

\*All-cause mortality (n=63) occurred in 50 Taiwanese and 13 Japanese, respectively.

**eTable 7.** Comparison between Asian and Western Individuals\*

|                                                   | Asians, n=1259 | Westerners, n=1072* |
|---------------------------------------------------|----------------|---------------------|
| <b>Baseline demography</b>                        |                |                     |
| Age, year                                         | 64±17          | 59±18               |
| Female                                            | 325(26)        | 189(18)             |
| Body surface area, m <sup>2</sup>                 | 1.67±0.21      | 2.0±0.2             |
| Charlson index                                    | 1.28±1.71      | 1.06 ± 1.25         |
| Diastolic blood pressure, mmHg                    | 65±13          | 64±13               |
| NYHA <sup>†</sup> (1245/1050)                     | 700(56)        | 675(64)             |
| I                                                 |                |                     |
| II                                                | 418(34)        | 267(25)             |
| III+IV                                            | 127(10)        | 108(10)             |
| BAV fusion, RL fusion                             | 177(73)        | 308(82)             |
| RN                                                | 50(21)         | 63(17)              |
| LN                                                | 15(6)          | 6(1)                |
| LVEF, %                                           | 55±11          | 59±9                |
| LVEDD, mm                                         | 60±8           | 60±7                |
| LVESD, mm                                         | 41±9           | 40±7                |
| LVEDDi, mm/m <sup>2</sup>                         | 36.6±5.2       | 30.3±4.1            |
| LVESDi, mm/m <sup>2</sup>                         | 24.7±5.7       | 20.2±3.8            |
| LVESDi>25 mm/m <sup>2</sup>                       | 481(38)        | 107(10)             |
| LVEDVi, ml/m <sup>2</sup> (n=1247/1007)           | 108±39         | 103±31              |
| LVESVi, ml/m <sup>2</sup> (n=1245/1007)           | 50±28          | 44±20               |
| Annulus, mm                                       | 23.4±3.2       | 26±3                |
| Indexed Annulus                                   | 14.2±1.9       | 13.0±1.6            |
| Sinus of Valsalva, mm                             | 40.5±8.2       | 41±6                |
| Indexed Sinus of Valsalva                         | 24.4±4.9       | 20.3±3.2            |
| Mid-ascending aorta, mm                           | 40.4±8.1       | 41±7                |
| Indexed Mid-ascending aorta                       | 24.7±5.5       | 20.4±4.4            |
| <b>Surgical indications (481<sup>†</sup>/552)</b> |                |                     |
| Symptoms                                          | 285(59)        | 345(63)             |
| LVEF<50%                                          | 47(10)         | 23(4)               |
| LVESD(i) >50mm(25mm/m <sup>2</sup> )              | 75(16)         | 21(3.8)             |
| Aortic aneurysm                                   | 21(4)          | 59(11)              |
| LVEDD>65mm                                        | 36(7)          | 62(11)              |
| Early surgery                                     | 17(4)          | 42(8)               |
| Aortic valve repair                               | 24(5)          | 122(22)             |
| Bioprosthesis                                     | 330(72)        | 234(54)             |
| Concomitant aorta surgery                         | 170(35)        | 175(32)             |

|                                                         |        |        |
|---------------------------------------------------------|--------|--------|
| Concomitant coronary artery bypass grafting             | 48(10) | 86(16) |
| 8-year incidence of aortic valve surgery <sup>§</sup>   | 48±2%  | 55±2%  |
| 8-year survival of total follow-up <sup>§</sup>         | 74±2%  | 78±2%  |
| 8-year survival under medical surveillance <sup>§</sup> | 68±2%  | 72±2%  |
| 8-year post-AVS survival <sup>§</sup>                   | 85±3%  | 84±2%  |

See Table 1 for abbreviations.

\*Western cohort was from Yang LT et al. *J Am Coll Cardiol.* 2020 Jul 21;76(3):233-246.

†Patients with undetermined NYHA status were excluded.

‡Of 483 patients having aortic valve surgery, 2 had it performed elsewhere hence surgical indications were lacking.

§For ease of comparison, data at 8-year was shown.
