# Supplementary material for: Analysis of Left Ventricular Indexes and Mortality Among Asian Adults With Hemodynamically Significant Chronic Aortic Regurgitation
Source: PubMed Central journal article supplement (PMC10313151; doi:10.1001/jamanetworkopen.2023.4632), 2023-03-24
Supplement: jamanetwopen-e234632-s002.pdf [file jamanetwopen-e234632-s002.pdf]

## Data Sharing Statement

Yang. Analysis of Left Ventricular Indexes and Mortality Among Asian Adults With Hemodynamically Significant Chronic Aortic Regurgitation. *JAMA Netw Open*. Published March 24, 2023. doi:10.1001/jamanetworkopen.2023.4632

### Data

**Data available:** No
